# Supplementary material for: Comparison of Presentation and Prognosis of Takayasu Arteritis with or without Stroke or Transient Ischemic Attack—A Retrospective Cohort Study
Source: MDPI journal article supplement (doi:10.3390/life12111904), 2022-11-16
Supplement: s1 [file s1]

Supplementary tables

**Table S1. Individual vascular involvement at initial assessment compared between TAK with or without stroke/TIA**

|                             | TAK without<br>Stroke/TIA<br>[ <i>n</i> (%)] | TAK with<br>Stroke/TIA<br>[ <i>n</i> (%)] | Odds Ratio<br>(95% CI)<br>(with vs.<br>without<br>stroke/TIA) | <i>p</i> Value *          |
|-----------------------------|----------------------------------------------|-------------------------------------------|---------------------------------------------------------------|---------------------------|
| <b>Vascular involvement</b> | <i>n</i> = 157                               | <i>n</i> = 33                             |                                                               |                           |
| Coronary                    | 3 (1.91%)                                    | 0 (0%)                                    | -                                                             | >0.999 <sup>b</sup>       |
| Right subclavian            | 56 (35.67%)                                  | 19 (57.58%)                               | 2.45 (1.14–5.25)                                              | <b>0.019</b> <sup>a</sup> |
| Left subclavian             | 114 (72.61%)                                 | 24 (72.73%)                               | 1.01 (0.43–2.34)                                              | 0.989 <sup>a</sup>        |
| Right carotid               | 56 (35.67%)                                  | 19 (57.58%)                               | 2.45 (1.14–5.25)                                              | <b>0.019</b> <sup>a</sup> |
| Left carotid                | 79 (50.32%)                                  | 20 (60.61%)                               | 1.52 (0.71–3.26)                                              | 0.282 <sup>a</sup>        |
| Right vertebral             | 6 (3.82%)                                    | 0 (0%)                                    | -                                                             | 0.592 <sup>b</sup>        |
| Left vertebral              | 18 (11.46%)                                  | 4 (12.12%)                                | 1.07 (0.34–3.38)                                              | >0.999 <sup>b</sup>       |
| Pulmonary                   | 10 (6.37%)                                   | 1 (3.03%)                                 | 0.46 (0.06–3.72)                                              | 0.693 <sup>b</sup>        |
| Brachiocephalic             | 37 (23.57%)                                  | 11 (33.33%)                               | 1.62 (0.72–3.65)                                              | 0.241 <sup>a</sup>        |
| Ascending aorta             | 31 (19.75%)                                  | 5 (15.15%)                                | 0.73 (0.26–2.03)                                              | 0.540 <sup>a</sup>        |
| Arch of aorta               | 55 (35.03%)                                  | 12 (36.36%)                               | 1.06 (0.49–2.31)                                              | 0.884 <sup>a</sup>        |
| Descending thoracic aorta   | 85 (54.14%)                                  | 9 (27.27%)                                | 0.32 (0.14–0.73)                                              | <b>0.005</b> <sup>a</sup> |
| Abdominal aorta             | 95 (60.51%)                                  | 10 (30.30%)                               | 0.28 (0.13–0.64)                                              | <b>0.002</b> <sup>a</sup> |
| Celiac trunk                | 46 (29.30%)                                  | 3 (9.09%)                                 | 0.24 (0.07–0.83)                                              | <b>0.016</b> <sup>b</sup> |
| Superior mesenteric artery  | 39 (24.84%)                                  | 5 (15.15%)                                | 0.54 (0.20–1.50)                                              | 0.230 <sup>a</sup>        |
| Inferior mesenteric artery  | 8 (5.10%)                                    | 0 (0%)                                    | -                                                             | 0.355 <sup>b</sup>        |

|                                                                          |             |             |                       |                    |
|--------------------------------------------------------------------------|-------------|-------------|-----------------------|--------------------|
| Right renal                                                              | 69 (43.95%) | 12 (36.36%) | 0.73 (0.34–<br>1.58)  | 0.423 <sup>a</sup> |
| Left renal                                                               | 67 (42.68%) | 11 (33.33%) | 0.67 (0.30–<br>1.48)  | 0.321 <sup>a</sup> |
| Right iliac                                                              | 9 (5.73%)   | 3 (9.09%)   | 1.64 (0.42–<br>6.43)  | 0.441 <sup>b</sup> |
| Left iliac                                                               | 10 (6.37%)  | 3 (9.09%)   | 1.47 (0.38–<br>5.66)  | 0.702 <sup>b</sup> |
| Right femoral                                                            | 1 (0.64%)   | 1 (3.03%)   | 4.88 (0.30–<br>79.99) | 0.318 <sup>b</sup> |
| Left femoral                                                             | 2 (1.27%)   | 1 (3.03%)   | 2.42 (0.21–<br>27.52) | 0.438 <sup>b</sup> |
| * Chi squared <sup>a</sup> / Fisher's exact <sup>b</sup> for proportions |             |             |                       |                    |
| TAK—Takayasu arteritis                                                   |             |             |                       |                    |
| 95% CI—95% confidence <i>p</i> values < 0.05 are highlighted in bold     |             |             |                       |                    |

**Table S2. Treatments received by the cohort compared between TAK with or without stroke/TIA**

|                                                       | <b>TAK without<br/>Stroke/TIA<br/>(<i>n</i> = 157)</b> | <b>TAK with<br/>Stroke/TIA<br/>(<i>n</i> = 34)</b> | <b><i>p</i> Value *</b> |
|-------------------------------------------------------|--------------------------------------------------------|----------------------------------------------------|-------------------------|
| <b>Glucocorticoids</b>                                |                                                        |                                                    |                         |
| n(%)                                                  | 120 (76.92%)                                           | 28 (82.35%)                                        | 0.489 <sup>a</sup>      |
| on intravenous<br>methylprednisolone<br>n(%)          | 2 (1.65%)                                              | 0 (0%)                                             | >0.999 <sup>b</sup>     |
| Starting dose (mean with SD)                          | 33.73 ± 14.40<br>( <i>n</i> = 117)                     | 30.67 ± 15.74<br>( <i>n</i> = 26)                  | 0.337                   |
| Continuing at last follow-up<br>n(%)                  | 95 (79.17%)                                            | 23 (67.65%)                                        | 0.161 <sup>a</sup>      |
| Duration in months (mean ±<br>SD)                     | 36.63 ± 31.76<br>( <i>n</i> = 117)                     | 42.48 ± 55.14<br>( <i>n</i> = 23)                  | 0.484                   |
| Percentage reduction in<br>prednisolone at last visit | 86.93 ± 17.65<br>( <i>n</i> = 101)                     | 90.44 ± 13.16<br>( <i>n</i> = 18)                  | 0.423                   |
| <b>Methotrexate</b>                                   |                                                        |                                                    |                         |
| n(%)                                                  | 69 (43.95%)                                            | 11 (32.35%)                                        | 0.214 <sup>a</sup>      |
| Continuing at last follow-up<br>n(%)                  | 34 (49.28%)                                            | 6 (54.55%)                                         | 0.745 <sup>a</sup>      |
| Duration in months (mean ±<br>SD)                     | 33.04 ± 33.94<br>( <i>n</i> = 67)                      | 31.40 ± 21.26<br>( <i>n</i> = 10)                  | 0.883                   |
| <b>Leflunomide</b>                                    |                                                        |                                                    |                         |
| n (%)                                                 | 1 (0.64%)                                              | 1 (2.94%)                                          | 0.325 <sup>b</sup>      |
| Continuing at last follow-up<br>n (%)                 | 1 (100%)                                               | 0 (0%)                                             | >0.999 <sup>b</sup>     |
| Duration in months (mean ±<br>SD)                     | 3                                                      | 13                                                 | -                       |
| <b>Azathioprine</b>                                   |                                                        |                                                    |                         |
| n (%)                                                 | 20 (12.74%)                                            | 8 (23.53%)                                         | 0.107 <sup>a</sup>      |
| Continuing at last follow-up<br>n (%)                 | 6 (30.00%)                                             | 3 (37.50%)                                         | >0.999 <sup>b</sup>     |
| Duration in months (mean ±<br>SD)                     | 29.63 ± 29.22<br>( <i>n</i> = 19)                      | 34.38 ± 46.98<br>( <i>n</i> = 7)                   | 0.758                   |
| <b>Mycophenolate</b>                                  |                                                        |                                                    |                         |
| n (%)                                                 | 28 (17.83%)                                            | 6 (17.65%)                                         | 0.979 <sup>a</sup>      |
| Continuing at last follow-up<br>n(%)                  | 16 (57.14%)                                            | 3 (50%)                                            | >0.999 <sup>b</sup>     |

|                                                              |                                       |                                      |                           |
|--------------------------------------------------------------|---------------------------------------|--------------------------------------|---------------------------|
| Duration in months (mean $\pm$ SD)                           | 17.73 $\pm$ 17.65<br>( <i>n</i> = 28) | 12.50 $\pm$ 12.32<br>( <i>n</i> = 6) | 0.497                     |
| <b>Tacrolimus</b>                                            |                                       |                                      |                           |
| n(%)                                                         | 59 (37.58%)                           | 9 (26.47%)                           | 0.220 <sup>a</sup>        |
| Continuing at last follow-up<br>n(%)                         | 46 (77.97%)                           | 8 (88.89%)                           | 0.450 <sup>a</sup>        |
| Duration in months (mean $\pm$ SD)                           | 16.66 $\pm$ 18.28<br>( <i>n</i> = 59) | 27.67 $\pm$ 30.81<br>( <i>n</i> = 9) | 0.133                     |
| <b>Cyclophosphamide</b>                                      |                                       |                                      |                           |
| n(%)                                                         | 1 (0.64%)                             | 3 (8.82%)                            | <b>0.018</b> <sup>b</sup> |
| Continuing at last follow-up<br>n(%)                         | 0 (0%)                                | 0 (0%)                               | -                         |
| Duration in months (mean $\pm$ SD)                           | 6                                     | 5.67 $\pm$ 2.52                      | -                         |
| <b>Total number of csDMARDs received</b> (mean with SD)      | 1.13 $\pm$ 0.90                       | 1.12 $\pm$ 1.12                      | 0.928                     |
| <b>Adalimumab</b>                                            |                                       |                                      |                           |
| n(%)                                                         | 1 (0.64%)                             | 0 (0%)                               | >0.999 <sup>b</sup>       |
| Continuing at last follow-up<br>n(%)                         | 1 (100%)                              | -                                    | -                         |
| Duration in months (mean $\pm$ SD)                           | 10                                    | -                                    | -                         |
| <b>Tocilizumab</b>                                           |                                       |                                      |                           |
| n(%)                                                         | 3 (1.91%)                             | 1 (2.94%)                            | 0.547 <sup>b</sup>        |
| Continuing at last follow-up<br>n(%)                         | 0 (0%)                                | 0 (0%)                               | -                         |
| Duration in months (mean $\pm$ SD)                           | 4.67 $\pm$ 0.58                       | 26                                   | -                         |
| <b>Tofacitinib</b>                                           |                                       |                                      |                           |
| n(%)                                                         | 0 (0%)                                | 1 (2.94%)                            | 0.178 <sup>b</sup>        |
| Continuing at last follow-up<br>n(%)                         | -                                     | 1 (100%)                             | -                         |
| Duration in months (mean $\pm$ SD)                           | -                                     | 12                                   | -                         |
| <b>Total number of ts or bDMARDs received</b> (mean with SD) | 0.03 $\pm$ 0.18                       | 0.06 $\pm$ 0.34                      | 0.508                     |
| <b>Antihypertensives</b>                                     |                                       |                                      |                           |
| n(%)                                                         | 124 (78.98%)                          | 24 (70.59%)                          | 0.288 <sup>a</sup>        |
| Mean ( $\pm$ SD) number of antihypertensives at presentation | 2.24 $\pm$ 1.17<br>( <i>n</i> = 123)  | 2.25 $\pm$ 1.22<br>( <i>n</i> = 24)  | 0.957                     |

|                                 |             |                         |                               |
|---------------------------------|-------------|-------------------------|-------------------------------|
| <b>Aspirin</b>                  | 33 (21.02%) | 15 (57.7%) <sup>a</sup> | <b>&lt;0.001</b> <sup>a</sup> |
| <b>Clopidogrel</b> <sup>a</sup> | 13 (8.28%)  | 7 (26.9%) <sup>a</sup>  | <b>0.010</b> <sup>a</sup>     |
| <b>Statin</b> <sup>a</sup>      | 10 (6.37%)  | 13 (50%) <sup>a</sup>   | <b>&lt;0.001</b> <sup>a</sup> |

\* Chi squared<sup>a</sup> /Fisher's exact<sup>b</sup> for proportions

<sup>a</sup> Amongst those with ischemic stroke at presentation ( $n = 26$ )

SD—Standard deviation; TAK—Takayasu arteritis

$p$  values < 0.05 are highlighted in bold

**Table S3. Summary of observational studies comparing patients with TAK with or without stroke or TIA.**

| <b>Study, Country [Reference]</b> | <b>Number of Stroke/TIA, Number of Controls</b>                     | <b>Summary of Key Differences</b>                                                                                                                                                                                                                                                                                                                                                                                                                                                                                                                                                                                                                                                                                                                                                                         |
|-----------------------------------|---------------------------------------------------------------------|-----------------------------------------------------------------------------------------------------------------------------------------------------------------------------------------------------------------------------------------------------------------------------------------------------------------------------------------------------------------------------------------------------------------------------------------------------------------------------------------------------------------------------------------------------------------------------------------------------------------------------------------------------------------------------------------------------------------------------------------------------------------------------------------------------------|
| Couture et al. 2018, France [32]  | 17 stroke/TIA, 17 sex-matched controls                              | <p>TAK with vs. without stroke/TIA.</p> <ul style="list-style-type: none"> <li>• Similar traditional CVD risk factors</li> <li>• Similar clinical features related to TAK</li> <li>• Similar extracranial vascular involvement</li> <li>• Greater frequency of intracranial involvement</li> <li>• Two deaths vs one death</li> </ul>                                                                                                                                                                                                                                                                                                                                                                                                                                                                     |
| Ahn et al. 2022, South Korea [9]  | 73 stroke, 992 without stroke                                       | <p>SIR for stroke with TAK 7.39 (95%CI 5.79–9.29) when compared with the general population.</p> <p>TAK with vs without stroke</p> <ul style="list-style-type: none"> <li>• Similar age and gender distribution</li> <li>• Similar traditional CVD risk factors</li> </ul>                                                                                                                                                                                                                                                                                                                                                                                                                                                                                                                                |
| Kong et al. 2021, China [33]      | 42 TAK with cerebral infarction, 80 TAK without cerebral infarction | <p>TAK with vs. without cerebral infarction</p> <ul style="list-style-type: none"> <li>• Relatively greater proportion of males</li> <li>• More frequent hyperlipidemia</li> <li>• More common blurring of vision &amp; syncope</li> <li>• Higher baseline disease activity by ITAS2010.</li> <li>• Similar distribution of Hata's angiographic subtypes</li> <li>• More frequent involvement of common carotid artery, internal carotid artery, vertebral artery, basilar artery, anterior cerebral artery, middle cerebral artery, and posterior cerebral artery</li> <li>• Greater number of stenosed arteries</li> <li>• Greater number of occluded arteries.</li> </ul> <p>ITAS2010 <math>\geq 6</math> had AUC of 0.692 for stroke<br/>ITAS2010 <math>\geq 7</math> had AUC of 0.754 for stroke</p> |
| Mirouse et al. 2022, France [34]  | 63 TAK with stroke or TIA, 257 without stroke or TIA                | <p>TAK with vs. without stroke/TIA</p> <ul style="list-style-type: none"> <li>• Similar distribution of age and sex</li> <li>• Longer delay to diagnosis</li> <li>• Greater prevalence of carotidodynia</li> <li>• More frequently had a prior history of stroke</li> <li>• Less frequently had a prior history of myocardial infarction</li> <li>• Greater frequency of involvement of supra-aortic trunk and thoracic aorta</li> </ul>                                                                                                                                                                                                                                                                                                                                                                  |

|                                                   |                                                                                          |                                                                                                                                                                                                                                                                                                                                                                                                                                                                                                                                                                                                                                                                                                                               |
|---------------------------------------------------|------------------------------------------------------------------------------------------|-------------------------------------------------------------------------------------------------------------------------------------------------------------------------------------------------------------------------------------------------------------------------------------------------------------------------------------------------------------------------------------------------------------------------------------------------------------------------------------------------------------------------------------------------------------------------------------------------------------------------------------------------------------------------------------------------------------------------------|
| Misra et al.<br>2022, India<br>[present<br>study] | 34<br>stroke/TIA,<br>157 controls<br>(34 matched<br>pairs using<br>propensity<br>scores) | TAK with vs. without stroke/TIA <ul style="list-style-type: none"> <li>• Relatively greater proportion of males</li> <li>• Older age</li> <li>• More frequently had diabetes</li> <li>• More often had vision loss or syncope</li> <li>• Less often had asymmetry of pulse or blood pressure</li> <li>• More often had Hata's angiographic subtype IIa and less frequently had subtype V.</li> <li>• Similar mortality—unadjusted hazard ratio 0.76 (95%CI 0.15–3.99), hazard ratio adjusted for gender, age at onset, delay to diagnosis, disease activity at baseline, DMARD use 1.38 (95%CI 0.19–10.20).</li> <li>• Similar mortality between propensity-score matched pairs of TAK with or without stroke/TIA.</li> </ul> |
|---------------------------------------------------|------------------------------------------------------------------------------------------|-------------------------------------------------------------------------------------------------------------------------------------------------------------------------------------------------------------------------------------------------------------------------------------------------------------------------------------------------------------------------------------------------------------------------------------------------------------------------------------------------------------------------------------------------------------------------------------------------------------------------------------------------------------------------------------------------------------------------------|

---

95%CI—95% confidence interval; AUC—Area under the receiver operating characteristics curve; CVD—Cardiovascular disease; DMARD—Disease-modifying anti-rheumatic drug; ITAS2010—Indian Takayasu Arteritis Clinical Activity Score 2010; TAK—Takayasu arteritis; TIA—Transient Ischemic Attack

---
